# Supplementary material for: Gut microbiome is affected by inter-sexual and inter-seasonal variation in diet for thick-billed murres (Uria lomvia)
Source: PubMed Central journal article supplement (PMC7806582; doi:10.1038/s41598-020-80557-x), 2021-01-13
Supplement: 41598_2020_80557_MOESM1_ESM.pdf [file 41598_2020_80557_MOESM1_ESM.pdf]

**Supplementary Information for Gut microbiome is affected by inter-sexual and inter-seasonal variation in diet for thick-billed murres (*Uria lomvia*)**

Esteban Góngora<sup>1\*</sup>, Kyle H. Elliott<sup>1</sup>, and Lyle Whyte<sup>1</sup>

<sup>1</sup>Department of Natural Resource Sciences, McGill University, 21111 Lakeshore Road, Sainte-Anne-de-Bellevue, Canada, H9X 3V9

\*Corresponding author: Esteban Góngora, Department of Natural Resource Sciences, McGill University, 21111 Lakeshore Road, Sainte-Anne-de-Bellevue, Canada, H9X 3V9, Telephone:

+(1) 514-398-7891, Email: [esteban.gongora@mail.mcgill.ca](mailto:esteban.gongora@mail.mcgill.ca)

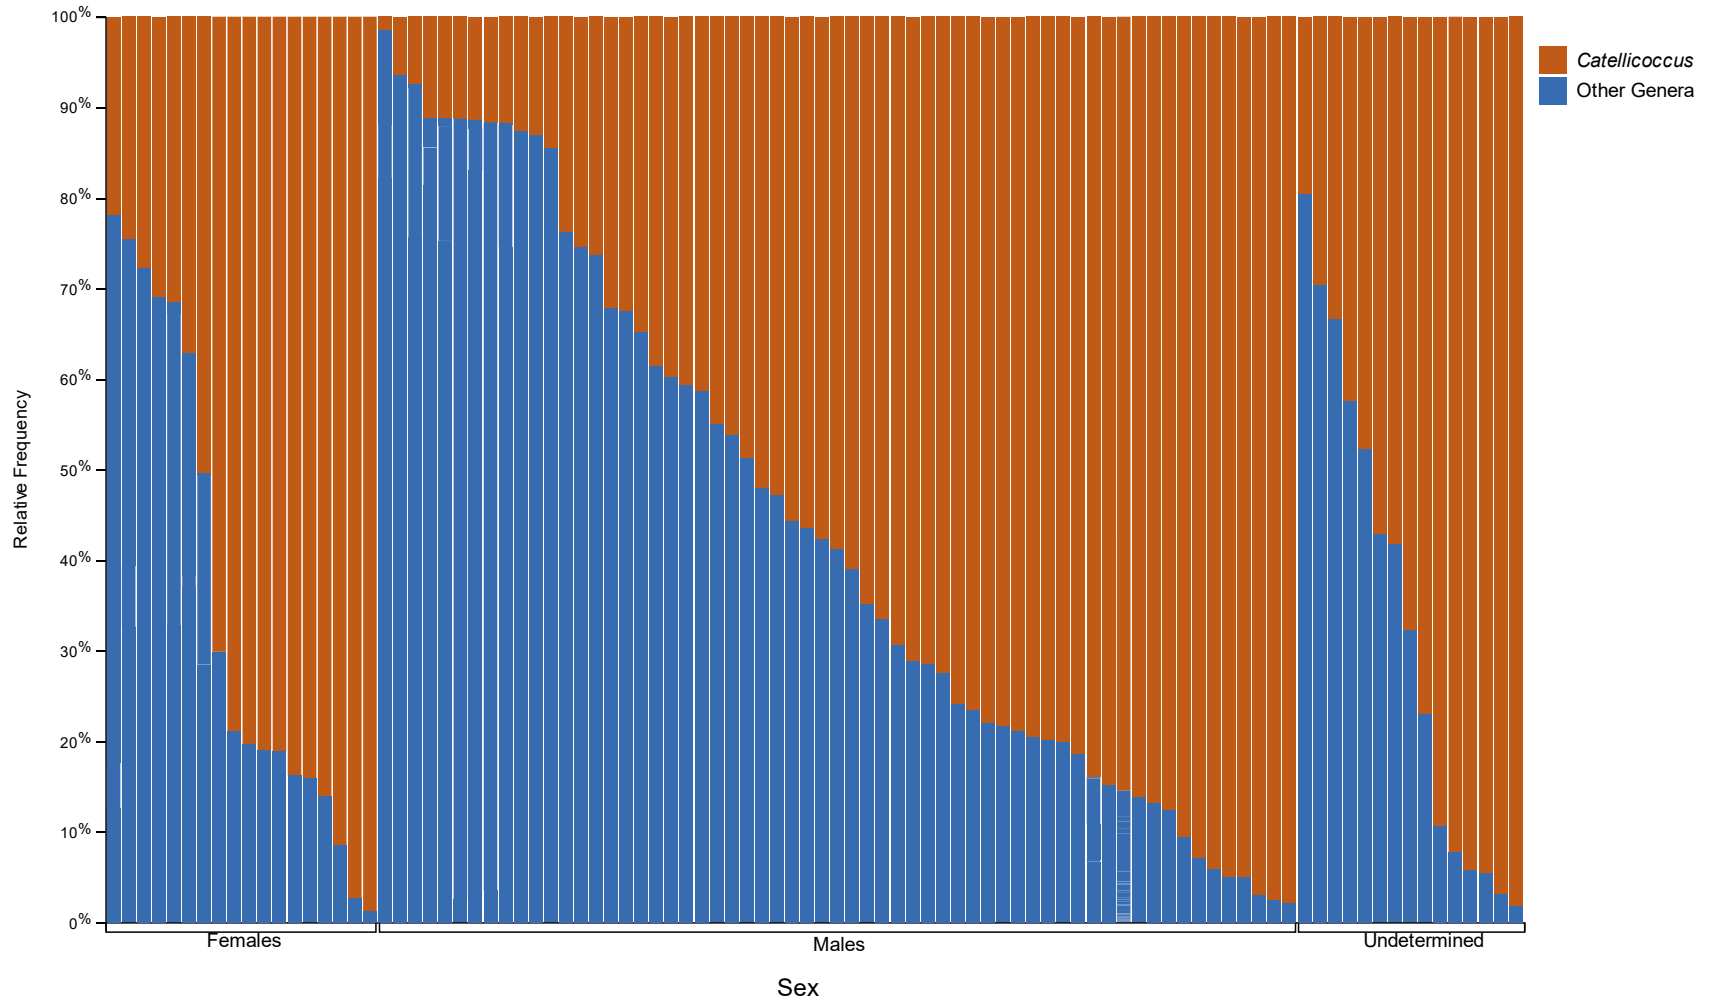

**Supplementary Figure 1.** Taxonomic classification at the Genus level of the ASVs obtained from murre fecal samples separated by the sex of the sampled birds. A strong influence of bacteria belonging to the genus *Catellicoccus*, compared to all other genera, can be observed.

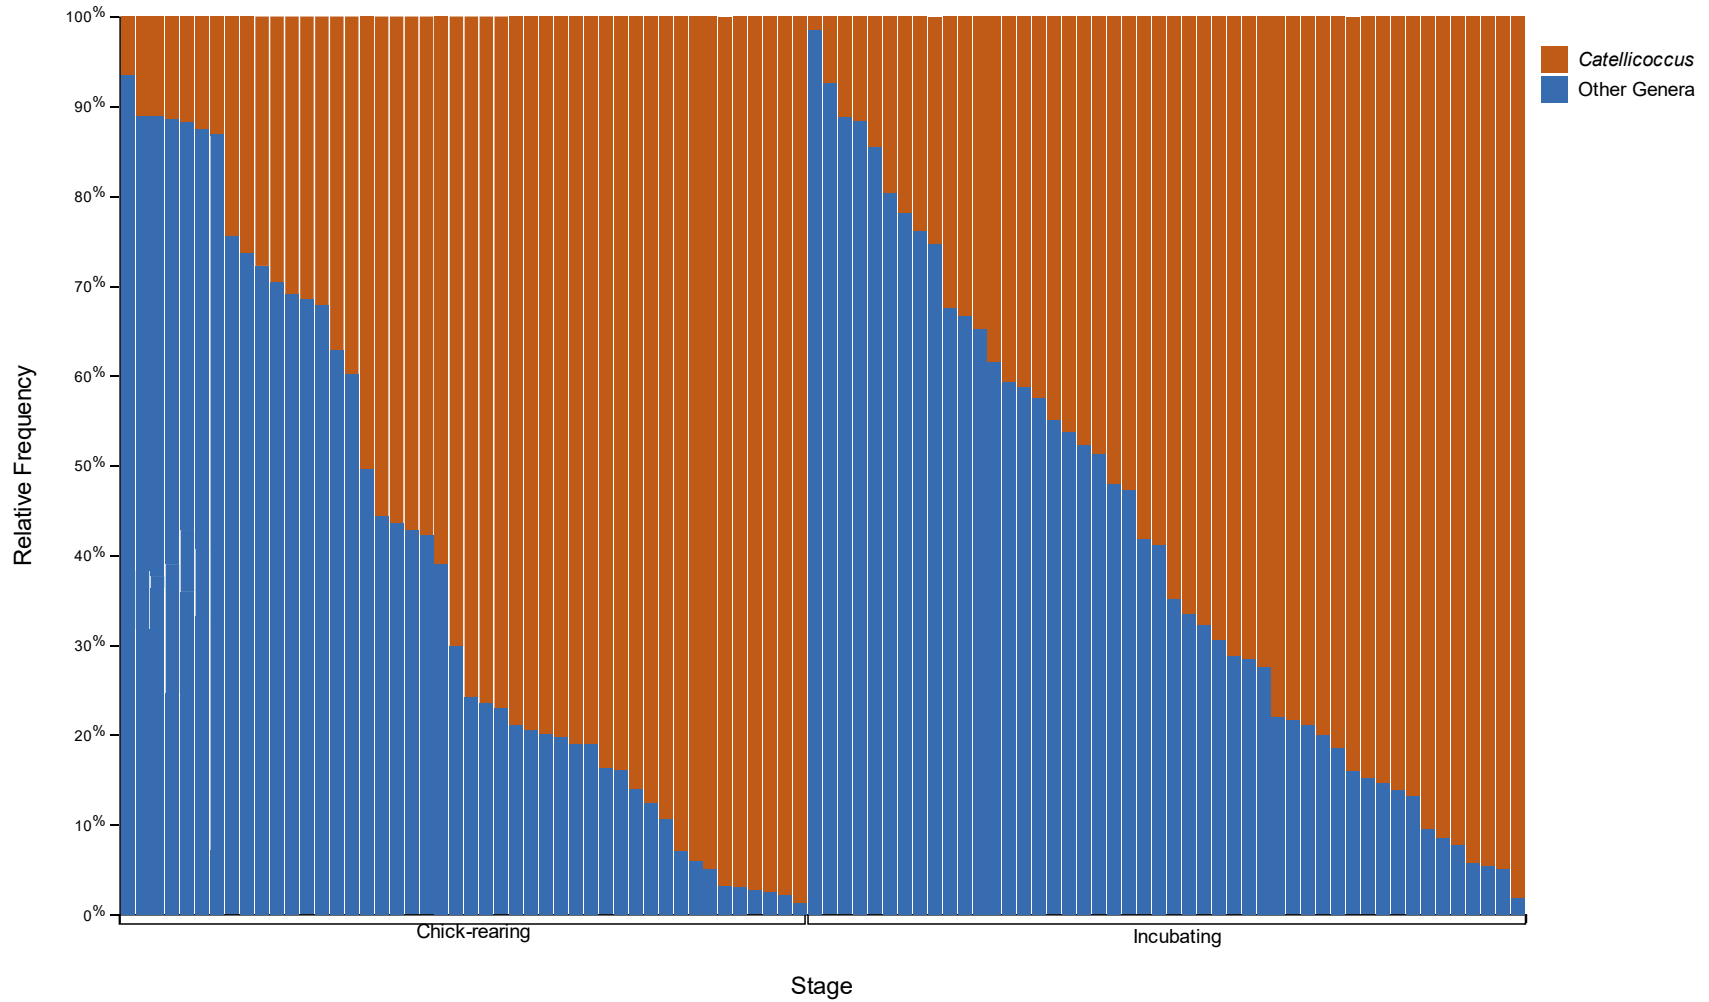

**Supplementary Figure 2.** Taxonomic classification at the Genus level of the ASVs obtained from murre fecal samples separated by the reproductive stage at which the bird was during sampling. A strong influence of bacteria belonging to the genus *Catellicoccus*, compared to all other genera, can be observed.

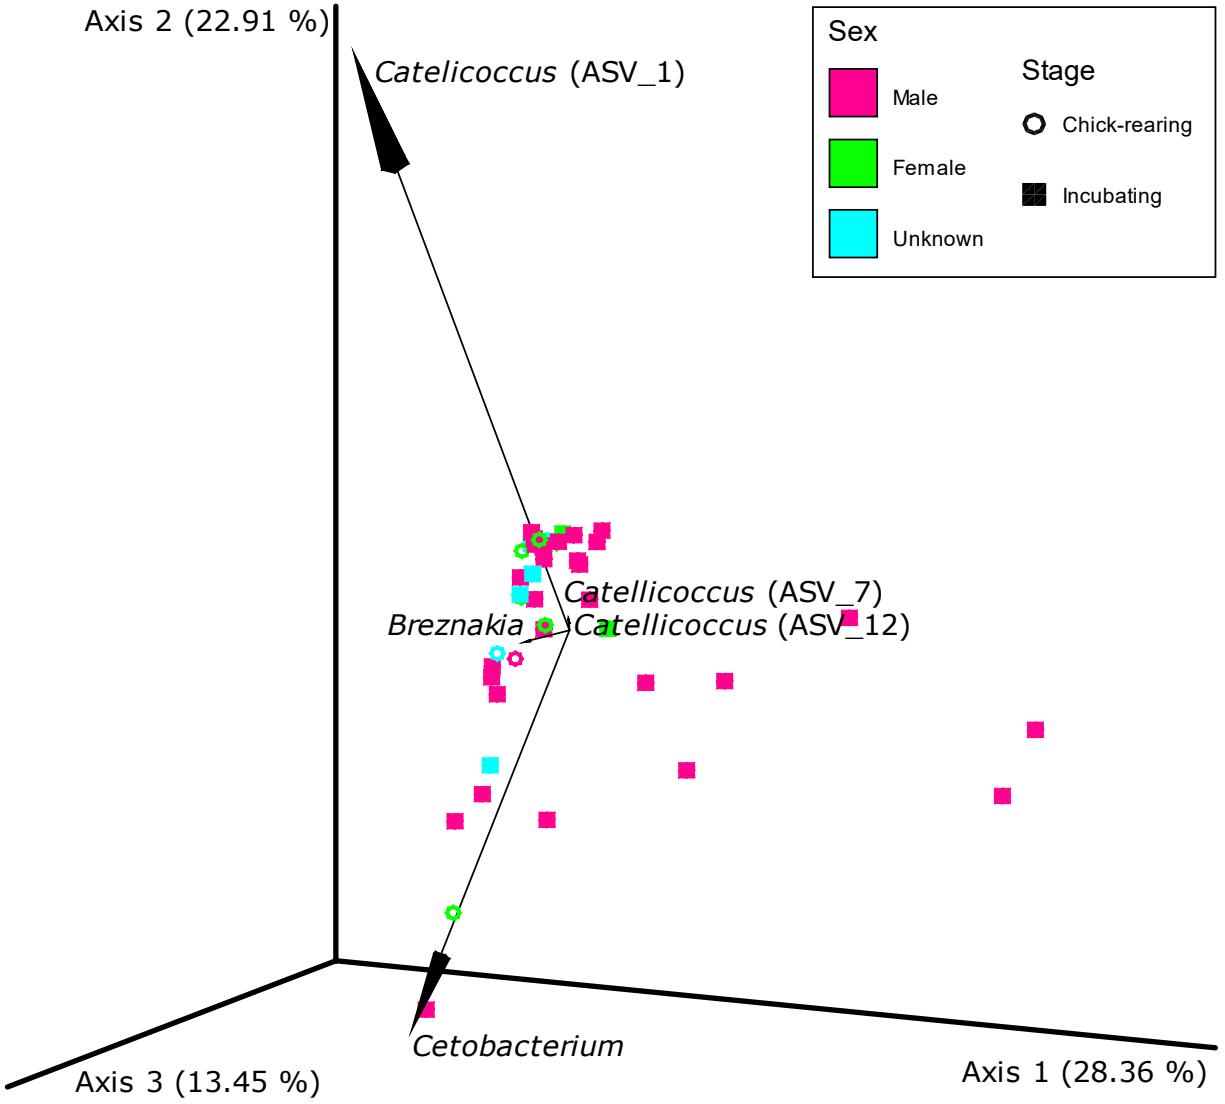

**Supplementary Figure 3.** Principal Coordinates Analysis (PCoA) plot for the gut community composition using the weighted UniFrac metric with samples identified by sex and reproductive stage. Biplots show the taxonomy of the ASVs with the top 5 effects on the community composition with position of the arrow indicating the direction of the effect.

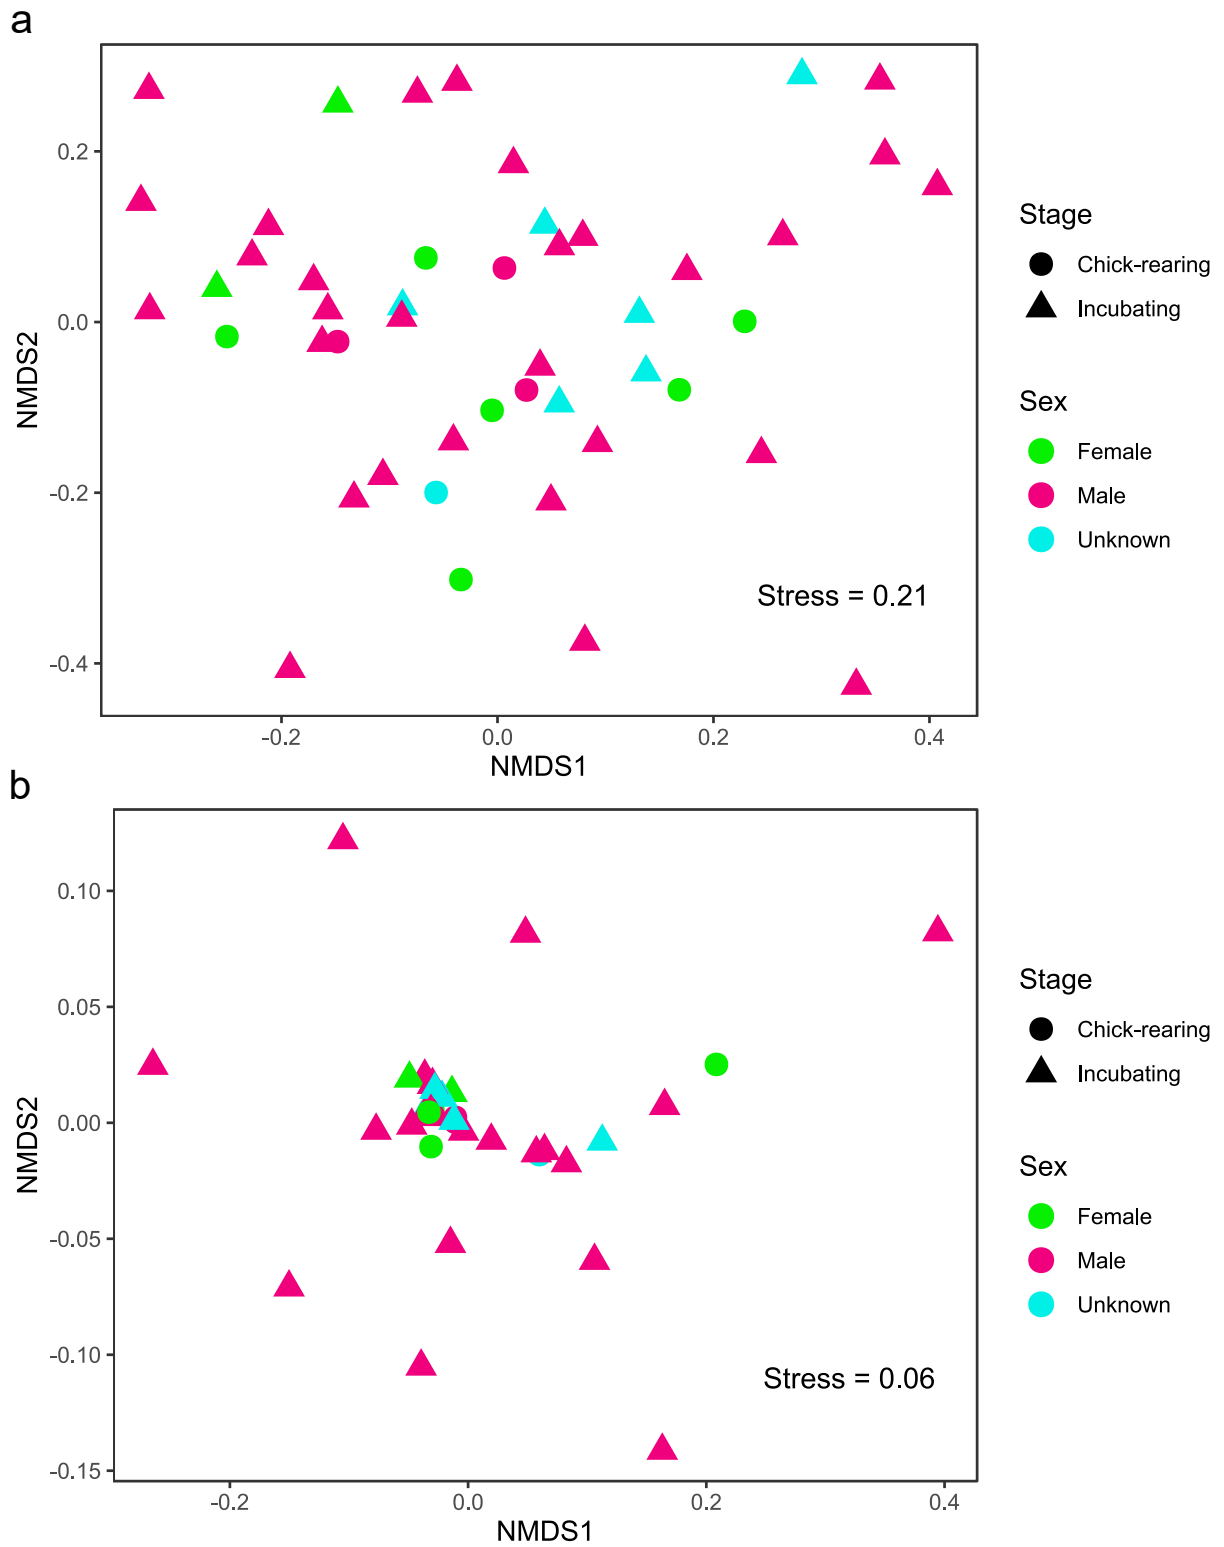

**Supplementary Figure 4.** Non-metric Multi-dimensional Scaling (NMDS) plots for the gut community composition using the (a) unweighted UniFrac and (b) weighted UniFrac metrics with samples identified by sex and reproductive stage.

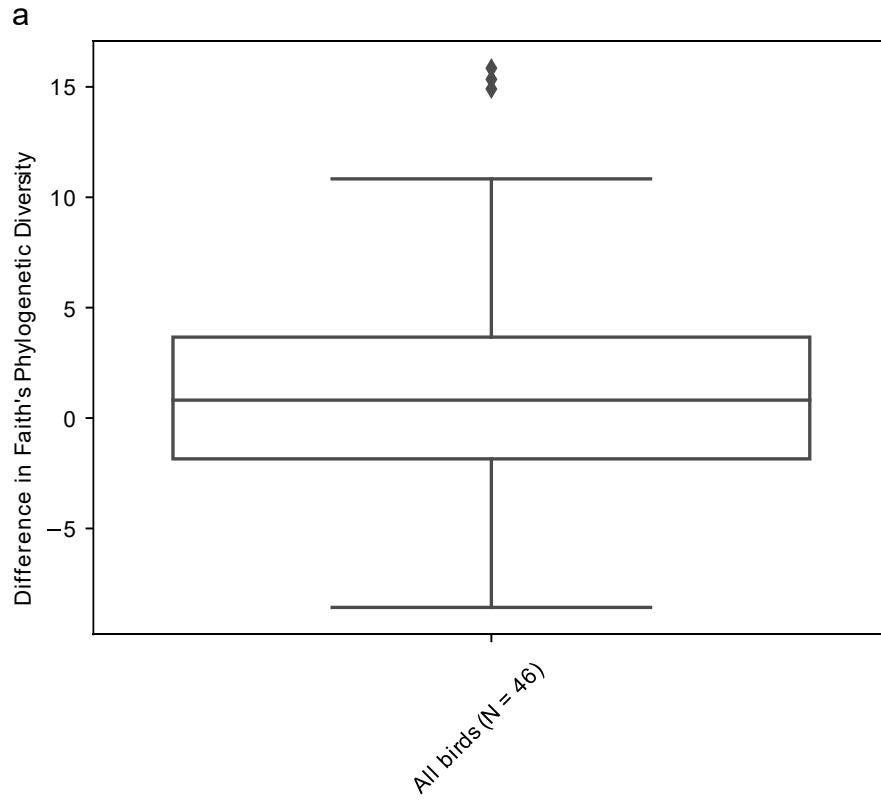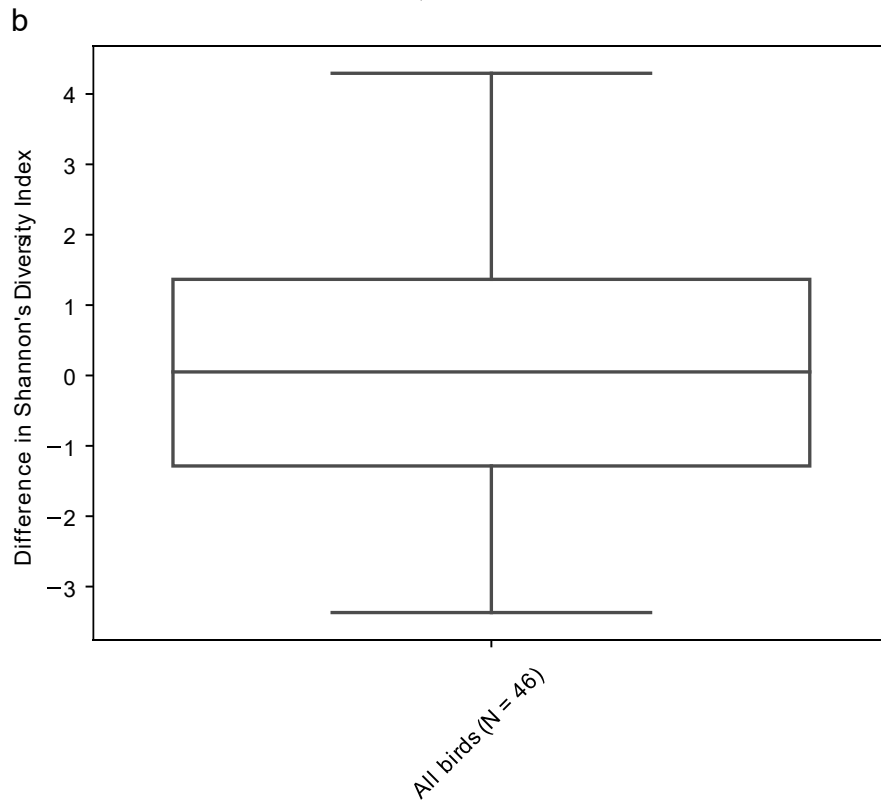

**Supplementary Figure 5.** Differences in **(a)** Faith's phylogenetic diversity and **(b)** Shannon's Diversity Index between samples from the same bird in the two studied time points.

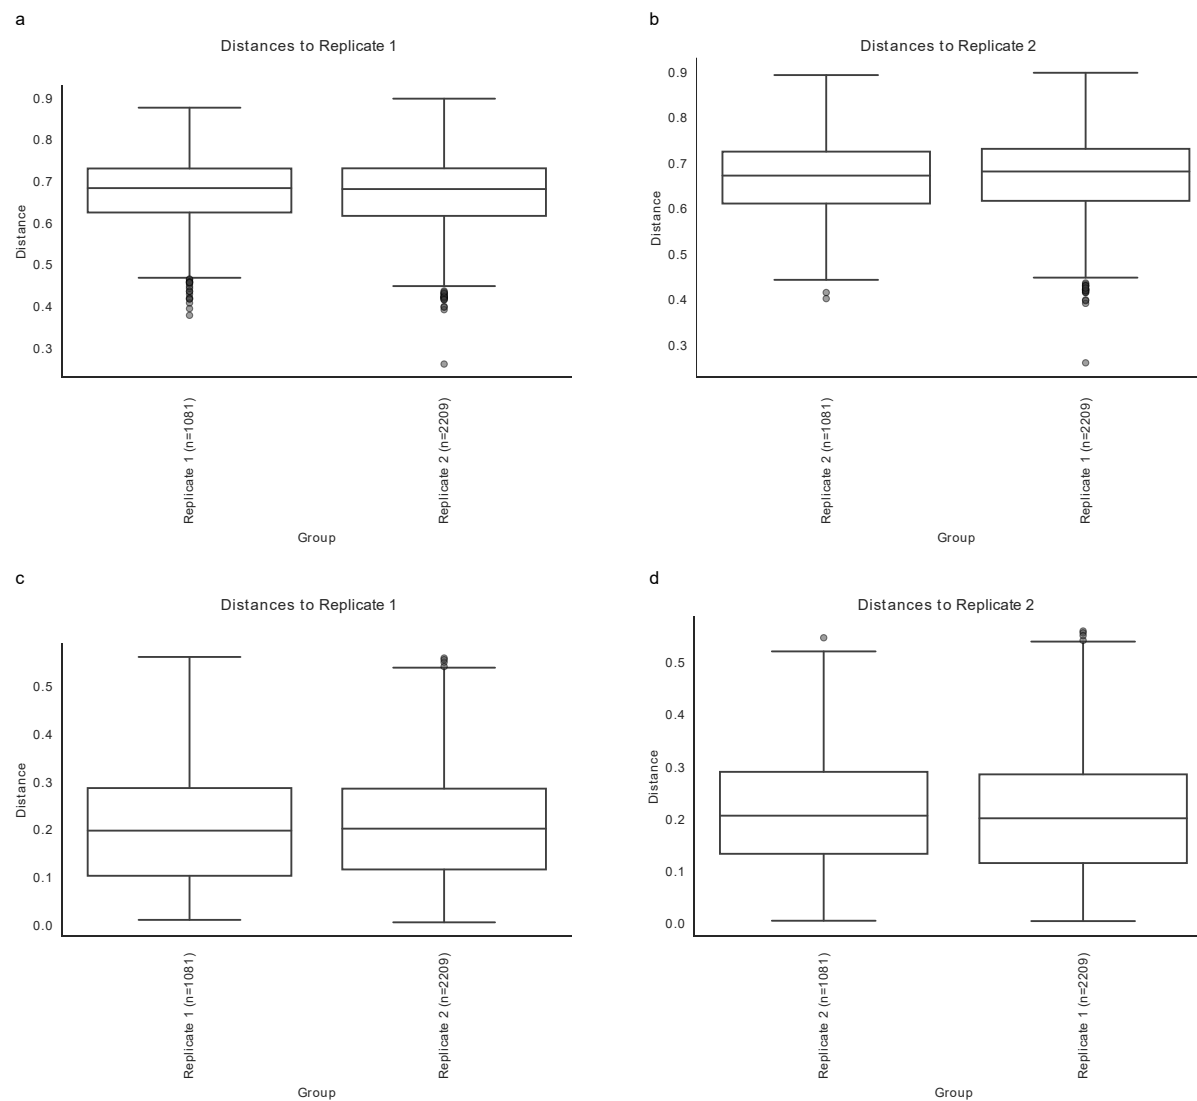

**Supplementary Figure 6.** Differences in (a and b) unweighted UniFrac (c and d) and weighted UniFrac distances between samples from different sampling points or among different samples from the same sampling points showing that there are no detectable differences between sampling points.

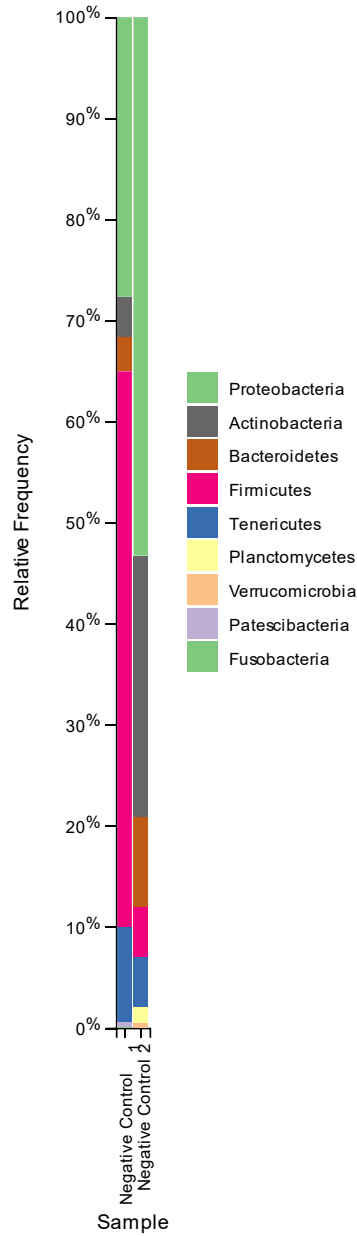

**Supplementary Figure 7.** Taxonomic classification at the Phylum level of the ASVs detected in the negative controls which were removed from the samples of the present study.



**Table S1.** DESeq2 results showing differences in ASV abundance between sexes or seasons along with the taxonomy of each of these ASVs.

| Row | Category | Comparison                  | Base Mean  | log2 Fold Change | log2 Fold Change SE | Wald Statistic | <i>p</i> | <i>p</i> <sub>adj</sub> |
|-----|----------|-----------------------------|------------|------------------|---------------------|----------------|----------|-------------------------|
| 1   | Sex      | Male vs Female              | 23.3049525 | 21.05287543      | 2.922304317         | 7.204203652    | 5.84E-13 | 1.30E-11                |
| 2   | Sex      | Male vs Female              | 29.4750752 | 23.06125581      | 3.427710075         | 6.727889844    | 1.72E-11 | 2.39E-10                |
| 3   | Sex      | Male vs Female              | 28.7521648 | 6.12947426       | 2.051538158         | 2.987745676    | 0.00281  | 0.023997                |
| 4   | Sex      | Male vs Female              | 42.2219483 | 23.55571092      | 3.678459901         | 6.40368838     | 1.52E-10 | 1.87E-09                |
| 5   | Sex      | Male vs Female              | 24.7476437 | 22.81730019      | 3.678723734         | 6.202504413    | 5.56E-10 | 5.61E-09                |
| 6   | Sex      | Male vs Female              | 9.70400599 | 21.50691554      | 3.094951926         | 6.949030566    | 3.68E-12 | 5.83E-11                |
| 7   | Sex      | Male vs Female              | 43.7941691 | 23.53157484      | 2.824498825         | 8.331239026    | 8.00E-17 | 7.85E-15                |
| 8   | Sex      | Male vs Female              | 37.2035401 | 23.38799891      | 2.91252211          | 8.030153257    | 9.74E-16 | 3.60E-14                |
| 9   | Sex      | Male vs Female              | 43.5999389 | 23.60857436      | 2.952953097         | 7.994903267    | 1.30E-15 | 3.60E-14                |
| 10  | Sex      | Male vs Female              | 361.036003 | 6.932628823      | 1.952405383         | 3.550814233    | 0.000384 | 0.003552                |
| 11  | Sex      | Male vs Female              | 26.1652012 | 21.93409943      | 3.110125012         | 7.052481601    | 1.76E-12 | 3.25E-11                |
| 12  | Sex      | Male vs Female              | 27.1588966 | 7.520732346      | 2.551233157         | 2.947881234    | 0.0032   | 0.025368                |
| 13  | Sex      | Male vs Female              | 34.2336819 | 23.26667586      | 3.678547267         | 6.324963139    | 2.53E-10 | 2.81E-09                |
| 14  | Sex      | Male vs Female              | 22.3547708 | 22.67662055      | 2.744188346         | 8.263507343    | 1.41E-16 | 7.85E-15                |
| 15  | Sex      | Male vs Female              | 183.334153 | -2.402760468     | 0.861766867         | -2.788179217   | 0.005301 | 0.039224                |
| 16  | Stage    | Chick-rearing vs Incubating | 11.5392506 | 4.966452558      | 1.96570865          | 2.526545608    | 0.011519 | 0.04409                 |

|    |       |                             |            |              |             |              |          |          |
|----|-------|-----------------------------|------------|--------------|-------------|--------------|----------|----------|
| 17 | Stage | Chick-rearing vs Incubating | 24.7496158 | 22.80595425  | 2.723179708 | 8.374751833  | 5.53E-17 | 7.62E-16 |
| 18 | Stage | Chick-rearing vs Incubating | 71.5661805 | 8.907157413  | 3.581328669 | 2.48710974   | 0.012879 | 0.047651 |
| 19 | Stage | Chick-rearing vs Incubating | 21.1338166 | 22.59696445  | 2.965206921 | 7.620704071  | 2.52E-14 | 2.80E-13 |
| 20 | Stage | Chick-rearing vs Incubating | 15.3129338 | 7.25890192   | 2.792979012 | 2.598981907  | 0.00935  | 0.044049 |
| 21 | Stage | Chick-rearing vs Incubating | 37.8904604 | 9.159982677  | 3.58395341  | 2.555831962  | 0.010593 | 0.04409  |
| 22 | Stage | Chick-rearing vs Incubating | 31.7024425 | -6.78627885  | 2.593237118 | -2.616914127 | 0.008873 | 0.044049 |
| 23 | Stage | Chick-rearing vs Incubating | 11.6481111 | 6.304012704  | 2.476473838 | 2.545559985  | 0.01091  | 0.04409  |
| 24 | Stage | Chick-rearing vs Incubating | 221.989994 | -4.191451611 | 1.638425252 | -2.558219612 | 0.010521 | 0.04409  |
| 25 | Stage | Chick-rearing vs Incubating | 24.7306109 | 22.75387446  | 2.721165448 | 8.361812207  | 6.18E-17 | 7.62E-16 |
| 26 | Stage | Chick-rearing vs Incubating | 52.38769   | 7.761698295  | 2.094280528 | 3.706140697  | 0.00021  | 0.001795 |
| 27 | Stage | Chick-rearing vs Incubating | 18.1565593 | 6.764604851  | 2.342924357 | 2.887248506  | 0.003886 | 0.023943 |
| 28 | Stage | Chick-rearing vs Incubating | 12.5616797 | 6.405362706  | 2.470591381 | 2.592643508  | 0.009524 | 0.044049 |
| 29 | Stage | Chick-rearing vs Incubating | 42.7847936 | 23.57396784  | 2.411964288 | 9.773763217  | 1.46E-22 | 8.10E-21 |
| 30 | Stage | Chick-rearing vs Incubating | 36.2515828 | 23.35002833  | 2.479559442 | 9.417006883  | 4.64E-21 | 1.29E-19 |
| 31 | Stage | Chick-rearing vs Incubating | 40.7390693 | 23.46120419  | 2.410614916 | 9.732456243  | 2.19E-22 | 8.11E-21 |
| 32 | Stage | Chick-rearing vs Incubating | 347.811666 | 6.912170052  | 1.582616086 | 4.367559584  | 1.26E-05 | 0.000116 |
| 33 | Stage | Chick-rearing vs Incubating | 70.7498483 | 4.702549123  | 1.638240608 | 2.870487461  | 0.004098 | 0.023943 |
| 34 | Stage | Chick-rearing vs Incubating | 84.7802262 | 8.712679829  | 2.694433995 | 3.233584436  | 0.001222 | 0.007982 |
| 35 | Stage | Chick-rearing vs Incubating | 52.6838393 | 22.97777326  | 2.706878263 | 8.488661485  | 2.09E-17 | 3.31E-16 |
| 36 | Stage | Chick-rearing vs Incubating | 25.4571288 | 7.695024651  | 2.12316969  | 3.62430977   | 0.00029  | 0.002144 |

|    |       |                             |            |             |             |             |          |          |
|----|-------|-----------------------------|------------|-------------|-------------|-------------|----------|----------|
| 37 | Stage | Chick-rearing vs Incubating | 151.890594 | 5.259961427 | 1.575457161 | 3.338688958 | 0.000842 | 0.00584  |
| 38 | Stage | Chick-rearing vs Incubating | 15.0641958 | 6.024789981 | 2.130890349 | 2.827358049 | 0.004693 | 0.026048 |
| 39 | Stage | Chick-rearing vs Incubating | 21.8236184 | 22.53002968 | 2.248311411 | 10.02086702 | 1.23E-23 | 1.37E-21 |
| 40 | Stage | Chick-rearing vs Incubating | 24.190142  | 22.77796955 | 2.558433531 | 8.903092174 | 5.43E-19 | 1.00E-17 |
| 41 | Stage | Chick-rearing vs Incubating | 525.505464 | 5.435002816 | 1.473894565 | 3.687511267 | 0.000226 | 0.001795 |
| 42 | Stage | Chick-rearing vs Incubating | 30.3254601 | 23.09377285 | 3.584044836 | 6.443494406 | 1.17E-10 | 1.18E-09 |
| 43 | Stage | Chick-rearing vs Incubating | 21.1219866 | 21.35791962 | 2.345590988 | 9.105560058 | 8.58E-20 | 1.91E-18 |
| 44 | Stage | Chick-rearing vs Incubating | 103.085346 | 5.143652055 | 1.895459722 | 2.713669933 | 0.006654 | 0.035172 |
| 45 | Stage | Chick-rearing vs Incubating | 98.0437356 | 1.886452082 | 0.745532436 | 2.530342062 | 0.011395 | 0.04409  |

**Table S1 (cont.)**

| Row | Phylum         | Class               | Order              | Family              | Genus                 |
|-----|----------------|---------------------|--------------------|---------------------|-----------------------|
| 1   | Bacteroidetes  | Bacteroidia         | Bacteroidales      | Porphyromonadaceae  | <i>Porphyromonas</i>  |
| 2   | Fusobacteria   | Fusobacteriia       | Fusobacteriales    | Fusobacteriaceae    | <i>Cetobacterium</i>  |
| 3   | Fusobacteria   | Fusobacteriia       | Fusobacteriales    | Fusobacteriaceae    | <i>Cetobacterium</i>  |
| 4   | Proteobacteria | Gammaproteobacteria | Pseudomonadales    | Moraxellaceae       | <i>Enhydrobacter</i>  |
| 5   | Proteobacteria | Gammaproteobacteria | Oceanospirillales  | Halomonadaceae      | <i>Halomonas</i>      |
| 6   | Actinobacteria | Actinobacteria      | Micrococcales      | Micrococcaceae      | <i>Micrococcus</i>    |
| 7   | Firmicutes     | Clostridia          | Clostridiales      | Family XI           | <i>Tissierella</i>    |
| 8   | Firmicutes     | Clostridia          | Clostridiales      | Family XI           | <i>Tissierella</i>    |
| 9   | Firmicutes     | Clostridia          | Clostridiales      | Family XI           | <i>Gottschalkia</i>   |
| 10  | Firmicutes     | Clostridia          | Clostridiales      | Family XI           | <i>Gottschalkia</i>   |
| 11  | Firmicutes     | Erysipelotrichia    | Erysipelotrichales | Erysipelotrichaceae | NA                    |
| 12  | Firmicutes     | Erysipelotrichia    | Erysipelotrichales | Erysipelotrichaceae | <i>Erysipelothrix</i> |
| 13  | Firmicutes     | Bacilli             | Bacillales         | Bacillaceae         | <i>Bacillus</i>       |

|    |                |                     |                    |                     |                                    |
|----|----------------|---------------------|--------------------|---------------------|------------------------------------|
| 14 | Firmicutes     | Bacilli             | Bacillales         | Bacillaceae         | NA                                 |
| 15 | Firmicutes     | Bacilli             | Lactobacillales    | Enterococcaceae     | <i>Catelicoccus</i>                |
| 16 | Bacteroidetes  | Bacteroidia         | Bacteroidales      | Porphyromonadaceae  | <i>Porphyromonas</i>               |
| 17 | Bacteroidetes  | Bacteroidia         | Bacteroidales      | Porphyromonadaceae  | <i>Porphyromonas</i>               |
| 18 | Tenericutes    | Mollicutes          | Mycoplasmatales    | Mycoplasmataceae    | <i>Mycoplasma</i>                  |
| 19 | Fusobacteria   | Fusobacteriia       | Fusobacteriales    | Fusobacteriaceae    | <i>Cetobacterium</i>               |
| 20 | Proteobacteria | Gammaproteobacteria | Pseudomonadales    | Moraxellaceae       | <i>Acinetobacter</i>               |
| 21 | Proteobacteria | Gammaproteobacteria | Pseudomonadales    | Moraxellaceae       | <i>Enhydrobacter</i>               |
| 22 | Actinobacteria | Actinobacteria      | NA                 | NA                  | NA                                 |
| 23 | Actinobacteria | Actinobacteria      | Micrococcales      | Micrococcaceae      | <i>Micrococcus</i>                 |
| 24 | Firmicutes     | Clostridia          | Clostridiales      | Ruminococcaceae     | <i>Fastidiosipila</i>              |
| 25 | Chlamydiae     | Chlamydiae          | Chlamydiales       | Chlamydiaceae       | <i>Chlamydia</i>                   |
| 26 | Firmicutes     | Clostridia          | Clostridiales      | Clostridiaceae 1    | <i>Clostridium sensu stricto 1</i> |
| 27 | Firmicutes     | Clostridia          | Clostridiales      | Clostridiaceae 1    | <i>Clostridium sensu stricto 1</i> |
| 28 | Firmicutes     | Clostridia          | Clostridiales      | Family XI           | NA                                 |
| 29 | Firmicutes     | Clostridia          | Clostridiales      | Family XI           | <i>Tissierella</i>                 |
| 30 | Firmicutes     | Clostridia          | Clostridiales      | Family XI           | <i>Tissierella</i>                 |
| 31 | Firmicutes     | Clostridia          | Clostridiales      | Family XI           | <i>Gottschalkia</i>                |
| 32 | Firmicutes     | Clostridia          | Clostridiales      | Family XI           | <i>Gottschalkia</i>                |
| 33 | Firmicutes     | Clostridia          | Clostridiales      | Family XI           | <i>Gottschalkia</i>                |
| 34 | Firmicutes     | Clostridia          | Clostridiales      | Family XI           | <i>Parvimonas</i>                  |
| 35 | Firmicutes     | Erysipelotrichia    | Erysipelotrichales | Erysipelotrichaceae | NA                                 |
| 36 | Firmicutes     | Erysipelotrichia    | Erysipelotrichales | Erysipelotrichaceae | <i>Erysipelothrix</i>              |
| 37 | Firmicutes     | Bacilli             | Lactobacillales    | Carnobacteriaceae   | <i>Atopostipes</i>                 |
| 38 | Firmicutes     | Bacilli             | Lactobacillales    | Carnobacteriaceae   | <i>Atopostipes</i>                 |
| 39 | Firmicutes     | Bacilli             | Lactobacillales    | Carnobacteriaceae   | NA                                 |
| 40 | Firmicutes     | Bacilli             | Lactobacillales    | Carnobacteriaceae   | <i>Atopostipes</i>                 |
| 41 | Firmicutes     | Bacilli             | Lactobacillales    | Lactobacillaceae    | <i>Lactobacillus</i>               |
| 42 | Firmicutes     | Bacilli             | Bacillales         | Bacillaceae         | <i>Bacillus</i>                    |

|    |            |         |                 |                 |                     |
|----|------------|---------|-----------------|-----------------|---------------------|
| 43 | Firmicutes | Bacilli | Bacillales      | Bacillaceae     | NA                  |
| 44 | Firmicutes | Bacilli | Bacillales      | Bacillaceae     | NA                  |
| 45 | Firmicutes | Bacilli | Lactobacillales | Enterococcaceae | <i>Catelicoccus</i> |

**Table S2.** Stable isotope ratio, sexing, and sample collection data of thick-billed murre samples collected at Coats Island, Canada.

| SampleID | BirdID    | Date       | Sample | Color | $\delta^{13}\text{C}$ | %C   | $\delta^{15}\text{N}$ | %N    | $\delta^{34}\text{S}$ | %S   | Sex | Status        |
|----------|-----------|------------|--------|-------|-----------------------|------|-----------------------|-------|-----------------------|------|-----|---------------|
| EGT1     | 99676429  | 10/07/2017 | 1      | W     | N/A                   | N/A  | N/A                   | N/A   | N/A                   | N/A  | N/A | Incubating    |
| EGT100   | 99658331  | 28/07/2017 | 1      | YW    | -20.75                | 42.4 | 15.52                 | 13.17 | 18.04                 | 0.66 | N/A | Chick-rearing |
| EGT101   | 117639797 | 28/07/2017 | 1      | W     | N/A                   | N/A  | N/A                   | N/A   | N/A                   | N/A  | F   | Chick-rearing |
| EGT102   | 99679694  | 28/07/2017 | 1      | RW    | -20.34                | 48.2 | 15.27                 | 15.4  | 19.49                 | 0.69 | F   | Chick-rearing |
| EGT103   | 99656411  | 28/07/2017 | 1      | Y     | -20.66                | 48.2 | 14.11                 | 15    | 17.03                 | 0.72 | M   | Chick-rearing |
| EGT104   | 99680764  | 28/07/2017 | 1      | W     | N/A                   | N/A  | N/A                   | N/A   | N/A                   | N/A  | M   | Chick-rearing |
| EGT105   | 118606010 | 28/07/2017 | 1      | W     | -20.43                | 49.9 | 15.59                 | 15.3  | 19.57                 | 0.64 | F   | Chick-rearing |
| EGT106   | 99653374  | 28/07/2017 | 1      | RW    | -21.14                | 48.2 | 15.33                 | 13.89 | 16.45                 | 0.74 | F   | Chick-rearing |
| EGT107   | 99653374  | 01/08/2017 | 2      | R     | N/A                   | N/A  | N/A                   | N/A   | N/A                   | N/A  | F   | Chick-rearing |
| EGT108   | 99680540  | 01/08/2017 | 2      | RW    | N/A                   | N/A  | N/A                   | N/A   | N/A                   | N/A  | F   | Chick-rearing |
| EGT109   | 99656411  | 02/08/2017 | 2      | W     | N/A                   | N/A  | N/A                   | N/A   | N/A                   | N/A  | M   | Chick-rearing |
| EGT11    | 99670720  | 06/07/2017 | 2      | Y     | -20.31                | 48.8 | 13.83                 | 15.2  | 18.69                 | 0.61 | M   | Incubating    |
| EGT110   | 117639823 | 01/08/2017 | 2      | RW    | N/A                   | N/A  | N/A                   | N/A   | N/A                   | N/A  | F   | Chick-rearing |
| EGT111   | 99679694  | 01/08/2017 | 2      | Y     | N/A                   | N/A  | N/A                   | N/A   | N/A                   | N/A  | F   | Chick-rearing |
| EGT112   | 99658331  | 01/08/2017 | 2      | RW    | N/A                   | N/A  | N/A                   | N/A   | N/A                   | N/A  | N/A | Chick-rearing |
| EGT113   | 99680764  | 01/08/2017 | 2      | W     | N/A                   | N/A  | N/A                   | N/A   | N/A                   | N/A  | M   | Chick-rearing |
| EGT114   | 118606010 | 01/08/2017 | 2      | YG    | N/A                   | N/A  | N/A                   | N/A   | N/A                   | N/A  | F   | Chick-rearing |
| EGT115   | 99676921  | 01/08/2017 | 2      | R     | N/A                   | N/A  | N/A                   | N/A   | N/A                   | N/A  | F   | Chick-rearing |
| EGT116   | 117639797 | 01/08/2017 | 2      | Y     | N/A                   | N/A  | N/A                   | N/A   | N/A                   | N/A  | F   | Chick-rearing |
| EGT12    | 99686990  | 07/07/2017 | 2      | Y     | -20.44                | 49.7 | 14.67                 | 15.3  | 19.57                 | 0.82 | M   | Incubating    |
| EGT13    | 99667063  | 09/07/2017 | 2      | R     | -20.58                | 48.2 | 14.29                 | 15.1  | 17.24                 | 0.73 | M   | Incubating    |
| EGT14    | 99686180  | 09/07/2017 | 2      | Y     | -20.67                | 47.8 | 14.39                 | 14.86 | 19.61                 | 0.71 | M   | Incubating    |
| EGT17    | 99676429  | 12/07/2017 | 2      | Y     | N/A                   | N/A  | N/A                   | N/A   | N/A                   | N/A  | N/A | Incubating    |
| EGT18    | 117639776 | 12/07/2017 | 2      | W     | -20.97                | 50.1 | 14.71                 | 14.52 | 19.28                 | 0.74 | N/A | Incubating    |
| EGT19    | 99676337  | 06/07/2017 | 1      | Y     | N/A                   | N/A  | N/A                   | N/A   | N/A                   | N/A  | F   | Incubating    |
| EGT20    | 99676338  | 06/07/2017 | 1      | R     | N/A                   | N/A  | N/A                   | N/A   | N/A                   | N/A  | M   | Incubating    |
| EGT21    | 99696862  | 12/07/2017 | 2      | Y     | N/A                   | N/A  | N/A                   | N/A   | N/A                   | N/A  | N/A | Incubating    |
| EGT22    | 99667218  | 10/07/2017 | 1      | Y     | N/A                   | N/A  | N/A                   | N/A   | N/A                   | N/A  | M   | Incubating    |







|       |           |            |   |    |        |      |       |       |       |      |     |               |
|-------|-----------|------------|---|----|--------|------|-------|-------|-------|------|-----|---------------|
| EGT96 | 99697231  | 15/07/2017 | 1 | RW | N/A    | N/A  | N/A   | N/A   | N/A   | N/A  | N/A | Incubating    |
| EGT97 | 99676921  | 28/07/2017 | 1 | R  | -20.35 | 49   | 16.09 | 15.4  | 19.44 | 0.71 | F   | Chick-rearing |
| EGT98 | 117639823 | 28/07/2017 | 1 | W  | -20.35 | 48.7 | 15.45 | 14.9  | 19.68 | 0.65 | F   | Chick-rearing |
| EGT99 | 99680540  | 28/07/2017 | 1 | W  | -20.76 | 48.7 | 15.63 | 14.95 | 19.99 | 0.72 | F   | Chick-rearing |
